# Supplementary material
Source: PubMed Central journal article supplement (PMC4364874)
Supplement: embr0016-0351-sd4.pdf [file embr0016-0351-sd4.pdf]

**Table S1. *Saccharomyces cerevisiae* strains used in this study.**

| Strain     | Relevant genotype                                                                                         | Source     |
|------------|-----------------------------------------------------------------------------------------------------------|------------|
| W303       | <i>MATa/α ade2-1 can1-100 his3-11,15 leu2-3,112 trp1-1 ura3-1 rad5-535</i>                                |            |
| YLL936     | W303 <i>mre11Δ::HIS3</i>                                                                                  | 1          |
| YLL1069    | W303 <i>sae2Δ::KANMX</i>                                                                                  | 1          |
| YLL2402    | W303 <i>exo1Δ::LEU2</i>                                                                                   | 1          |
| YLL2403    | W303 <i>exo1Δ::LEU2 sae2Δ::KANMX</i>                                                                      | 1          |
| YLL2511    | W303 <i>dna2Δ::NATMX pif1-M2::URA3</i>                                                                    | This study |
| YLL3497    | W303 <i>sae2Δ::KANMX SGS1-ss-3HA::URA3</i>                                                                | This study |
| YLL3503    | W303 <i>sae2Δ::KANMX SGS1-ss::TRP1</i>                                                                    | This study |
| YLL3557    | W303 <i>sgs1-hd::LEU2</i>                                                                                 | This study |
| YLL3558    | W303 <i>sgs1-hd-ss::TRP1</i>                                                                              | This study |
| DMP2949    | W303 <i>rad9Δ::URA3</i>                                                                                   | This study |
| DMP5694    | W303 <i>mre11-H125N</i>                                                                                   | This study |
| DMP5936    | W303 <i>SGS1-ss::TRP1</i>                                                                                 | This study |
| DMP5952    | W303 <i>pif1-M2::URA3 yku70Δ::HIS3 sae2Δ::KANMX</i>                                                       | This study |
| DMP5956    | W303 <i>mre11-H125N SGS1-ss::TRP1</i>                                                                     | This study |
| DMP5964/7A | W303 <i>exo1Δ::LEU2 sae2Δ::KANMX SGS1-ss::TRP1</i>                                                        | This study |
| DMP5964/1B | W303 <i>exo1Δ::LEU2 SGS1-ss::TRP1</i>                                                                     | This study |
| DMP6008    | W303 <i>pif1-M2::URA3 sae2Δ::KANMX SGS1-ss::TRP1</i>                                                      | This study |
| DMP6011    | W303 <i>mre11Δ::KANMX SGS1-ss::TRP1</i>                                                                   | This study |
| DMP6068/2B | W303 <i>sae2Δ::KANMX rad9Δ::URA3</i>                                                                      | This study |
| DMP6068/4C | W303 <i>sae2Δ::KANMX rad9Δ::URA3</i>                                                                      | This study |
| DMP6068/2D | W303 <i>sae2Δ::KANMX rad9Δ::URA3 SGS1-ss::TRP1</i>                                                        | This study |
| DMP6068/6B | W303 <i>sae2Δ::KANMX rad9Δ::URA3 SGS1-ss::TRP1</i>                                                        | This study |
| JKM139     | <i>MATa hmlΔ::ADE1, hmrΔ::ADE1, ade1-100, lys5, leu2-3,112, trp1::hisG ura3-52, ho, ade3::GAL-HO site</i> | 2          |
| YLL1523    | JKM139 <i>sae2Δ::KANMX</i>                                                                                | This study |
| YLL1540    | JKM139 <i>exo1Δ::LEU2</i>                                                                                 | This study |
| YLL1643    | JKM139 <i>bar1Δ::HPHMX</i>                                                                                | This study |
| YLL2482    | JKM139 <i>sgs1Δ::NATMX</i>                                                                                | This study |
| YLL3397    | JKM139 <i>SGS1-3HA::URA3 bar1Δ::HPHMX</i>                                                                 | This study |
| YLL3507    | JKM139 <i>sae2Δ::KANMX SGS1-ss::TRP1</i>                                                                  | This study |
| YLL3564    | JKM139 <i>SGS1-3HA::URA3 rad9Δ::KANMX bar1Δ::HPHMX</i>                                                    | This study |
| DMP5685    | JKM139 <i>ku70Δ::URA3 bar1Δ::HPHMX</i>                                                                    | This study |
| DMP5793    | JKM139 <i>rad9Δ::KANMX</i>                                                                                | This study |
| DMP5984    | JKM139 <i>SGS1-ss::TRP1</i>                                                                               | This study |
| DMP5985    | JKM139 <i>SGS1-ss::TRP1 bar1Δ::HPHMX</i>                                                                  | This study |
| DMP6005    | JKM139 <i>rad9Δ::KANMX SGS1-ss::TRP1</i>                                                                  | This study |

|             |                                                                                                                              |            |
|-------------|------------------------------------------------------------------------------------------------------------------------------|------------|
| DMP6012     | JKM139 <i>rad9Δ::KANMX sgs1Δ::NATMX</i>                                                                                      | This study |
| DMP6034     | JKM139 <i>rad9Δ::KANMX sae2Δ::KANMX</i>                                                                                      | This study |
| DMP6080     | JKM139 <i>exo1Δ::LEU2 rad9Δ::KANMX</i>                                                                                       | This study |
| DMP6084/2B  | JKM139 <i>SGS1-ss-3HA::URA3 bar1Δ::HPHMX</i>                                                                                 | This study |
| DMP6084/5D  | JKM139 <i>SGS1-ss-3HA::URA3 rad9Δ::KANMX bar1Δ::HPHMX</i>                                                                    | This study |
| DMP6125/8A  | JKM139 <i>EXO1-18MYC::TRP1 bar1Δ::HPHMX</i>                                                                                  | This study |
| DMP6125/5A  | JKM139 <i>EXO1-18MYC::TRP1 rad9Δ::KANMX bar1Δ::HPHMX</i>                                                                     | This study |
| DMP6127     | JKM139 <i>exo1Δ::LEU2 SGS1-ss::TRP1</i>                                                                                      | This study |
| DMP6129/8A  | JKM139 <i>ku70Δ::URA3 SGS1-ss::TRP1 bar1Δ::HPHMX</i>                                                                         | This study |
| DMP6129/15B | JKM139 <i>ku70Δ::URA3 rad9Δ::KANMX bar1Δ::HPHMX</i>                                                                          | This study |
| DMP6145/2C  | JKM139 <i>MRE11-18MYC::TRP1 sae2Δ::KANMX</i>                                                                                 | This study |
| DMP6145/10B | JKM139 <i>MRE11-18MYC::TRP1 sae2Δ::KANMX SGS1-ss::TRP1</i>                                                                   | This study |
| SK1         | <i>MATa/MATα HO/HO lys2/lys2 ura3::hisG/ura3::hisG leu2::hisG/leu2::hisG</i>                                                 |            |
| DMP2679     | <i>SK1 sae2Δ::NATMX/sae2Δ ::NATMX</i>                                                                                        | 3          |
| DMP6071/2B  | <i>SK1 SGS1-ss::TRP1/SGS1-ss::TRP1</i>                                                                                       | This study |
| DMP6071/2A  | <i>SK1 sae2Δ::NATMX/sae2Δ::NATMX SGS1-ss::TRP1/SGS1-ss::TRP1</i>                                                             | This study |
| YMV45       | <i>ho hml::ADE1 mata::hisG hmr::ADE1 leu2::leu2(Asp718-Sall)-URA3-pBR332-MATa ade3::GAL::HO adel lys5 ura3-52 trp1::hisG</i> | 4          |
| YLL1621     | YMV45 <i>sae2Δ::KANMX</i>                                                                                                    | This study |
| YLL3583     | YMV45 <i>sae2Δ::KANMX SGS1-ss::TRP1</i>                                                                                      | This study |
| YLL3584     | YMV45 <i>SGS1-ss::TRP1</i>                                                                                                   | This study |

## References

1. Bonetti D, Martina M, Clerici M, Lucchini G and Longhese MP (2009) Multiple pathways regulate 3' overhang generation at *S. cerevisiae* telomeres. *Mol Cell* **35**: 70-81
2. Lee SE, Moore JK, Holmes A, Umezū K, Kolodner RD, Haber JE (1998) *Saccharomyces* Ku70, mre11/rad50 and RPA proteins regulate adaptation to G2/M arrest after DNA damage. *Cell* **94**: 399-409
3. Manfrini N, Guerini I, Citterio A, Lucchini G, Longhese MP (2010) Processing of meiotic DNA double strand breaks requires cyclin-dependent kinase and multiple nucleases. *J Biol Chem* **285**: 11628-11637
4. Vaze MB, Pelliccioli A, Lee SE, Ira G, Liberi G, Arbel-Eden A, Foiani M, Haber JE (2002) Recovery from checkpoint-mediated arrest after repair of a double-strand break requires Srs2 helicase. *Mol Cell* **10**: 373-385
