# Supplementary material
Source: PubMed Central journal article supplement (PMC4364874)

## Supplementary Figure S2

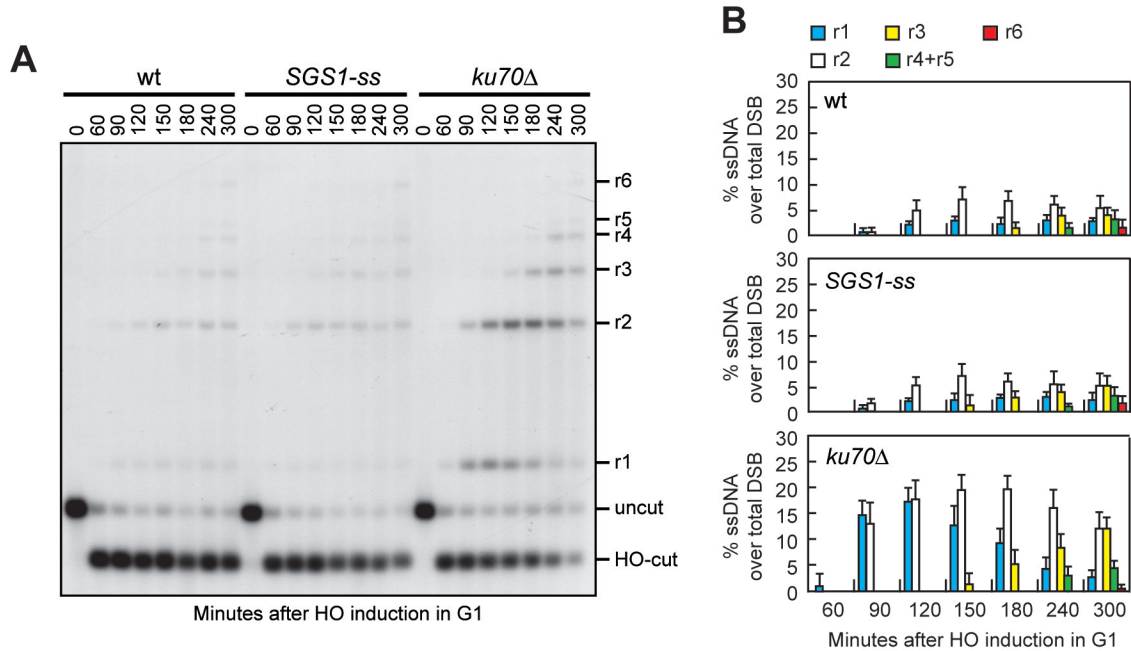

Supplement: embr0016-0351-sd2.pdf [file embr0016-0351-sd2.pdf]
